# Supplementary material for: An Insight into Cotton Leaf Curl Multan Betasatellite, the Most Important Component of Cotton Leaf Curl Disease Complex
Source: PubMed Central journal article supplement (PMC5691632; doi:10.3390/v9100280), 2017-09-29
Supplement: viruses-09-00280-s001.pdf [file viruses-09-00280-s001.pdf]

## Supplementary Information

**Table S1:** List of *Cotton leaf curl Multan betasatellite* accessions identified from cotton

| No. | Host                        | Year | Location | Accession numbers |
|-----|-----------------------------|------|----------|-------------------|
| 1   | <i>Gossypium hirsutum</i>   | 1996 | Pakistan | AJ298903          |
| 2   | <i>Gossypium hirsutum</i>   | 1995 | India    | AJ291601          |
| 3   | <i>Gossypium hirsutum</i>   | 1996 | Sudan    | AY077797          |
| 4   | <i>Gossypium hirsutum</i>   | 2000 | Pakistan | AJ292769          |
| 5   | <i>Gossypium hirsutum</i>   | 2001 | India    | AJ316037          |
| 6   | <i>Gossypium hirsutum</i>   | 2001 | India    | AJ316038          |
| 7   | <i>Gossypium hirsutum</i>   | 2001 | Sudan    | AY044140          |
| 10  | <i>Gossypium hirsutum</i>   | 2001 | India    | AJ315700          |
| 11  | <i>Gossypium hirsutum</i>   | 2004 | Sudan    | AY669328          |
| 12  | <i>Gossypium hirsutum</i>   | 2004 | India    | AY705381          |
| 13  | <i>Gossypium hirsutum</i>   | 2004 | India    | NC_007219         |
| 14  | <i>Gossypium hirsutum</i>   | 2005 | India    | DQ191161          |
| 15  | <i>Gossypium hirsutum</i>   | 2005 | Sudan    | NC_006935         |
| 16  | <i>Gossypium hirsutum</i>   | 2006 | India    | DQ364230          |
| 17  | <i>Gossypium punctatum</i>  | 2006 | Pakistan | EU384588          |
| 18  | <i>Gossypium punctatum</i>  | 2006 | Pakistan | EU384580          |
| 19  | <i>Gossypium punctatum</i>  | 2006 | Pakistan | EU384581          |
| 20  | <i>Gossypium punctatum</i>  | 2006 | Pakistan | EU384582          |
| 21  | <i>Gossypium punctatum</i>  | 2006 | Pakistan | EU384583          |
| 22  | <i>Gossypium punctatum</i>  | 2006 | Pakistan | EU384584          |
| 23  | <i>Gossypium punctatum</i>  | 2006 | Pakistan | EU384585          |
| 24  | <i>Gossypium punctatum</i>  | 2006 | Pakistan | EU384586          |
| 25  | <i>Gossypium punctatum</i>  | 2006 | Pakistan | EU384588          |
| 26  | <i>Gossypium punctatum</i>  | 2006 | Pakistan | EU384589          |
| 27  | <i>Gossypium latifolium</i> | 2006 | Pakistan | EU384590          |
| 28  | <i>Gossypium davidsonii</i> | 2006 | Pakistan | EU384592          |
| 29  | <i>Gossypium darwinii</i>   | 2006 | Pakistan | EU386596          |
| 30  | <i>Gossypium darwinii</i>   | 2006 | Pakistan | EU386597          |
| 31  | <i>Gossypium darwinii</i>   | 2006 | Pakistan | EU386598          |
| 32  | <i>Gossypium darwinii</i>   | 2006 | Pakistan | EU386599          |
| 33  | <i>Gossypium darwinii</i>   | 2006 | Pakistan | EU386600          |
| 34  | <i>Gossypium darwinii</i>   | 2006 | Pakistan | EU386601          |
| 35  | <i>Gossypium darwinii</i>   | 2006 | Pakistan | EU386602          |
| 36  | <i>Gossypium darwinii</i>   | 2006 | Pakistan | EU386603          |
| 37  | <i>Gossypium darwinii</i>   | 2006 | Pakistan | EU386604          |
| 38  | <i>Gossypium darwinii</i>   | 2006 | Pakistan | EU384605          |

|    |                            |      |          |           |
|----|----------------------------|------|----------|-----------|
| 39 | <i>Gossypium punctatum</i> | 2006 | Pakistan | EU384587  |
| 40 | <i>Gossypium hirsutum</i>  | 2007 | Pakistan | AM774306  |
| 41 | <i>Gossypium hirsutum</i>  | 2007 | Pakistan | AM774307  |
| 42 | <i>Gossypium hirsutum</i>  | 2007 | Pakistan | AM774308  |
| 43 | <i>Gossypium hirsutum</i>  | 2007 | Pakistan | AM774309  |
| 44 | <i>Gossypium hirsutum</i>  | 2007 | Pakistan | AM774310  |
| 45 | <i>Gossypium hirsutum</i>  | 2007 | Pakistan | AM774311  |
| 46 | <i>Gossypium hirsutum</i>  | 2007 | Pakistan | AM774312  |
| 47 | <i>Gossypium hirsutum</i>  | 2007 | Pakistan | AM774313  |
| 48 | <i>Gossypium hirsutum</i>  | 2008 | India    | GQ369730  |
| 49 | <i>Gossypium hirsutum</i>  | 2008 | India    | GQ369730  |
| 50 | <i>Gossypium hirsutum</i>  | 2008 | India    | GQ369730  |
| 51 | <i>Gossypium hirsutum</i>  | 2009 | India    | NC_013802 |
| 52 | <i>Gossypium hirsutum</i>  | 2009 | India    | FN658722  |
| 53 | <i>Gossypium hirsutum</i>  | 2009 | India    | FN658737  |
| 54 | <i>Gossypium hirsutum</i>  | 2009 | Pakistan | FN554719  |
| 55 | <i>Gossypium hirsutum</i>  | 2009 | Pakistan | FN554720  |
| 56 | <i>Gossypium hirsutum</i>  | 2009 | Pakistan | FN554721  |
| 57 | <i>Gossypium hirsutum</i>  | 2009 | Pakistan | FN554722  |
| 58 | <i>Gossypium hirsutum</i>  | 2009 | Pakistan | FN554723  |
| 59 | <i>Gossypium hirsutum</i>  | 2009 | Pakistan | FN554724  |
| 60 | <i>Gossypium hirsutum</i>  | 2010 | India    | GU440581  |
| 61 | <i>Gossypium hirsutum</i>  | 2010 | China    | GQ906588  |
| 62 | <i>Gossypium hirsutum</i>  | 2010 | India    | HM461864  |
| 63 | <i>Gossypium hirsutum</i>  | 2010 | India    | HM461865  |
| 64 | <i>Gossypium hirsutum</i>  | 2010 | India    | HM037921  |
| 65 | <i>Gossypium hirsutum</i>  | 2010 | India    | HM037922  |
| 66 | <i>Gossypium hirsutum</i>  | 2010 | India    | HM146307  |
| 67 | <i>Gossypium hirsutum</i>  | 2010 | India    | HM146308  |
| 68 | <i>Gossypium hirsutum</i>  | 2010 | India    | HQ158008  |
| 69 | <i>Gossypium hirsutum</i>  | 2010 | India    | HQ343201  |
| 70 | <i>Gossypium hirsutum</i>  | 2010 | Pakistan | HF542911  |
| 71 | <i>Gossypium hirsutum</i>  | 2010 | India    | NC_017829 |
| 72 | <i>Gossypium hirsutum</i>  | 2010 | India    | FR751147  |
| 73 | <i>Gossypium hirsutum</i>  | 2010 | India    | FR751148  |
| 74 | <i>Gossypium hirsutum</i>  | 2011 | India    | JF502374  |
| 75 | <i>Gossypium hirsutum</i>  | 2011 | India    | JF502375  |
| 76 | <i>Gossypium hirsutum</i>  | 2011 | India    | JF502376  |
| 77 | <i>Gossypium hirsutum</i>  | 2011 | India    | JF502377  |
| 78 | <i>Gossypium hirsutum</i>  | 2011 | India    | JF502378  |
| 79 | <i>Gossypium hirsutum</i>  | 2011 | India    | JF502379  |
| 80 | <i>Gossypium hirsutum</i>  | 2011 | India    | JF502380  |

|     |                           |      |          |          |
|-----|---------------------------|------|----------|----------|
| 81  | <i>Gossypium hirsutum</i> | 2011 | India    | JF502381 |
| 82  | <i>Gossypium hirsutum</i> | 2011 | India    | JF502382 |
| 83  | <i>Gossypium hirsutum</i> | 2011 | India    | JF502383 |
| 84  | <i>Gossypium hirsutum</i> | 2011 | India    | JF502384 |
| 85  | <i>Gossypium hirsutum</i> | 2011 | India    | JF502385 |
| 86  | <i>Gossypium hirsutum</i> | 2011 | India    | JF502386 |
| 87  | <i>Gossypium hirsutum</i> | 2011 | India    | JF502387 |
| 88  | <i>Gossypium hirsutum</i> | 2011 | India    | JF502388 |
| 89  | <i>Gossypium hirsutum</i> | 2011 | India    | JF502389 |
| 90  | <i>Gossypium hirsutum</i> | 2011 | India    | JF502390 |
| 91  | <i>Gossypium hirsutum</i> | 2011 | India    | JF502391 |
| 92  | <i>Gossypium hirsutum</i> | 2011 | India    | JF502392 |
| 93  | <i>Gossypium hirsutum</i> | 2011 | India    | JF502393 |
| 94  | <i>Gossypium hirsutum</i> | 2011 | India    | JF502394 |
| 95  | <i>Gossypium hirsutum</i> | 2011 | India    | JF502395 |
| 96  | <i>Gossypium hirsutum</i> | 2011 | India    | JF502396 |
| 97  | <i>Gossypium hirsutum</i> | 2011 | India    | JF502397 |
| 98  | <i>Gossypium hirsutum</i> | 2011 | India    | JF502398 |
| 99  | <i>Gossypium hirsutum</i> | 2011 | India    | JF509751 |
| 100 | <i>Gossypium hirsutum</i> | 2011 | India    | JF509752 |
| 101 | <i>Gossypium hirsutum</i> | 2011 | China    | JQ317604 |
| 102 | <i>Gossypium hirsutum</i> | 2011 | India    | FR877537 |
| 103 | <i>Gossypium hirsutum</i> | 2011 | Pakistan | HE601938 |
| 104 | <i>Gossypium hirsutum</i> | 2011 | Pakistan | HE601939 |
| 105 | <i>Gossypium hirsutum</i> | 2011 | Pakistan | HE601940 |
| 106 | <i>Gossypium hirsutum</i> | 2011 | Pakistan | HE601941 |
| 107 | <i>Gossypium hirsutum</i> | 2011 | Pakistan | HE601942 |
| 108 | <i>Gossypium hirsutum</i> | 2011 | Pakistan | HE601943 |
| 109 | <i>Gossypium hirsutum</i> | 2011 | Pakistan | HE601944 |
| 110 | <i>Gossypium hirsutum</i> | 2011 | Pakistan | HE601945 |
| 111 | <i>Gossypium hirsutum</i> | 2011 | Pakistan | HE601946 |
| 112 | <i>Gossypium hirsutum</i> | 2011 | Pakistan | HE601947 |
| 113 | <i>Gossypium hirsutum</i> | 2011 | Pakistan | HE601948 |
| 114 | <i>Gossypium hirsutum</i> | 2012 | Pakistan | HF549185 |
| 115 | <i>Gossypium hirsutum</i> | 2012 | Pakistan | HF549186 |
| 116 | <i>Gossypium hirsutum</i> | 2012 | Pakistan | HF549187 |
| 117 | <i>Gossypium hirsutum</i> | 2012 | Pakistan | HF549188 |
| 118 | <i>Gossypium hirsutum</i> | 2012 | China    | KC171655 |
| 119 | <i>Gossypium hirsutum</i> | 2012 | Pakistan | HE965435 |
| 120 | <i>Gossypium hirsutum</i> | 2012 | Pakistan | HE965436 |
| 121 | <i>Gossypium hirsutum</i> | 2012 | Pakistan | HE965437 |
| 122 | <i>Gossypium hirsutum</i> | 2012 | Pakistan | HE965438 |

|     |                           |      |          |          |
|-----|---------------------------|------|----------|----------|
| 123 | <i>Gossypium hirsutum</i> | 2012 | Pakistan | HE965439 |
| 124 | <i>Gossypium hirsutum</i> | 2012 | Pakistan | HE965440 |
| 125 | <i>Gossypium hirsutum</i> | 2012 | Pakistan | HE965441 |
| 126 | <i>Gossypium hirsutum</i> | 2012 | Pakistan | HE965442 |
| 127 | <i>Gossypium hirsutum</i> | 2012 | Pakistan | HE965443 |
| 128 | <i>Gossypium hirsutum</i> | 2012 | Pakistan | HE965444 |
| 129 | <i>Gossypium hirsutum</i> | 2012 | Pakistan | HE965445 |
| 130 | <i>Gossypium hirsutum</i> | 2012 | Pakistan | HE965446 |
| 131 | <i>Gossypium hirsutum</i> | 2012 | Pakistan | HE965447 |
| 132 | <i>Gossypium hirsutum</i> | 2012 | Pakistan | HE965448 |
| 133 | <i>Gossypium hirsutum</i> | 2012 | Pakistan | HE965449 |
| 134 | <i>Gossypium hirsutum</i> | 2012 | Pakistan | HE965450 |
| 135 | <i>Gossypium hirsutum</i> | 2012 | Pakistan | HE965451 |
| 136 | <i>Gossypium hirsutum</i> | 2012 | Pakistan | HE965452 |
| 137 | <i>Gossypium hirsutum</i> | 2012 | Pakistan | HE965453 |
| 138 | <i>Gossypium hirsutum</i> | 2012 | Pakistan | HE965454 |
| 139 | <i>Gossypium hirsutum</i> | 2012 | Pakistan | HE965455 |
| 140 | <i>Gossypium hirsutum</i> | 2012 | Pakistan | HE965456 |
| 141 | <i>Gossypium hirsutum</i> | 2012 | Pakistan | HE978339 |
| 142 | <i>Gossypium hirsutum</i> | 2012 | Pakistan | HE978340 |
| 143 | <i>Gossypium hirsutum</i> | 2012 | Pakistan | HE978341 |
| 144 | <i>Gossypium hirsutum</i> | 2012 | Pakistan | HE978342 |
| 145 | <i>Gossypium hirsutum</i> | 2012 | Pakistan | HE978343 |
| 146 | <i>Gossypium hirsutum</i> | 2012 | Pakistan | HE978344 |
| 147 | <i>Gossypium hirsutum</i> | 2012 | Pakistan | HF564596 |
| 148 | <i>Gossypium hirsutum</i> | 2012 | Pakistan | HF564596 |
| 149 | <i>Gossypium hirsutum</i> | 2012 | Pakistan | HF564597 |
| 150 | <i>Gossypium hirsutum</i> | 2012 | Pakistan | HF564598 |
| 151 | <i>Gossypium hirsutum</i> | 2012 | Pakistan | HF564599 |
| 152 | <i>Gossypium hirsutum</i> | 2012 | Pakistan | HF564603 |
| 153 | <i>Gossypium hirsutum</i> | 2012 | Pakistan | HF564604 |
| 154 | <i>Gossypium arboreum</i> | 2013 | Pakistan | HF912231 |
| 155 | <i>Gossypium arboreum</i> | 2013 | Pakistan | HF912232 |
| 156 | <i>Gossypium hirsutum</i> | 2013 | Pakistan | HF952152 |
| 157 | <i>Gossypium hirsutum</i> | 2013 | Pakistan | HF952153 |
| 158 | <i>Gossypium hirsutum</i> | 2013 | Pakistan | HF952156 |
| 159 | <i>Gossypium arboreum</i> | 2013 | Pakistan | HG428700 |
| 160 | <i>Gossypium hirsutum</i> | 2013 | Pakistan | HG428701 |
| 161 | <i>Gossypium hirsutum</i> | 2013 | Pakistan | HG428702 |
| 162 | <i>Gossypium hirsutum</i> | 2013 | Pakistan | HG428703 |
| 163 | <i>Gossypium hirsutum</i> | 2013 | Pakistan | HG428707 |
| 164 | <i>Gossypium hirsutum</i> | 2013 | Pakistan | HG422577 |

|     |                           |      |          |          |
|-----|---------------------------|------|----------|----------|
| 165 | <i>Gossypium hirsutum</i> | 2013 | Pakistan | HG422578 |
| 166 | <i>Gossypium hirsutum</i> | 2013 | Pakistan | HG422579 |
| 167 | <i>Gossypium hirsutum</i> | 2013 | Pakistan | HG422580 |
| 168 | <i>Gossypium hirsutum</i> | 2013 | Pakistan | HG422581 |
| 169 | <i>Gossypium hirsutum</i> | 2013 | Pakistan | HG422582 |
| 170 | <i>Gossypium hirsutum</i> | 2013 | Pakistan | HG422583 |
| 171 | <i>Gossypium hirsutum</i> | 2013 | Pakistan | HG000665 |
| 172 | <i>Gossypium hirsutum</i> | 2014 | India    | KP015741 |
| 173 | <i>Gossypium hirsutum</i> | 2014 | India    | KP015742 |
| 174 | <i>Gossypium hirsutum</i> | 2014 | India    | KP015743 |
| 175 | <i>Gossypium hirsutum</i> | 2014 | Pakistan | HG934394 |
| 176 | <i>Gossypium hirsutum</i> | 2014 | Pakistan | HG934395 |
| 177 | <i>Gossypium hirsutum</i> | 2014 | Pakistan | HG934396 |
| 178 | <i>Gossypium hirsutum</i> | 2014 | Pakistan | LK995398 |
| 179 | <i>Gossypium hirsutum</i> | 2014 | Pakistan | LK995399 |
| 180 | <i>Gossypium hirsutum</i> | 2014 | Pakistan | HF567946 |
| 181 | <i>Gossypium hirsutum</i> | 2014 | India    | KJ614434 |
| 182 | <i>Gossypium hirsutum</i> | 2014 | India    | KJ614435 |
| 183 | <i>Gossypium hirsutum</i> | 2014 | India    | KJ614436 |
| 184 | <i>Gossypium hirsutum</i> | 2014 | India    | KM070822 |
| 185 | <i>Gossypium hirsutum</i> | 2015 | China    | KP762787 |
| 186 | <i>Gossypium hirsutum</i> | 2015 | Pakistan | KR816003 |
| 187 | <i>Gossypium hirsutum</i> | 2015 | Pakistan | KR816004 |
| 188 | <i>Gossypium hirsutum</i> | 2015 | Pakistan | KR816005 |
| 189 | <i>Gossypium hirsutum</i> | 2015 | Pakistan | KR816006 |
| 190 | <i>Gossypium hirsutum</i> | 2015 | Pakistan | KR816007 |
| 191 | <i>Gossypium hirsutum</i> | 2015 | India    | KT228323 |
| 192 | <i>Gossypium hirsutum</i> | 2015 | India    | KT228324 |
| 193 | <i>Gossypium hirsutum</i> | 2015 | India    | KT228325 |
| 194 | <i>Gossypium hirsutum</i> | 2015 | India    | KT228326 |
| 195 | <i>Gossypium hirsutum</i> | 2015 | Pakistan | LN845926 |
| 196 | <i>Gossypium hirsutum</i> | 2015 | Pakistan | LN845927 |
| 197 | <i>Gossypium hirsutum</i> | 2015 | Pakistan | LN845928 |
| 198 | <i>Gossypium hirsutum</i> | 2015 | Pakistan | LN867444 |
| 199 | <i>Gossypium hirsutum</i> | 2015 | Pakistan | LN867445 |
| 200 | <i>Gossypium hirsutum</i> | 2015 | Pakistan | LN867446 |
| 201 | <i>Gossypium hirsutum</i> | 2015 | Pakistan | LN867447 |
| 202 | <i>Gossypium hirsutum</i> | 2015 | Pakistan | LN867448 |
| 203 | <i>Gossypium hirsutum</i> | 2015 | Pakistan | LN867449 |
| 204 | <i>Gossypium hirsutum</i> | 2015 | Pakistan | LN867450 |
| 205 | <i>Gossypium hirsutum</i> | 2015 | Pakistan | LN908793 |
| 206 | <i>Gossypium hirsutum</i> | 2015 | Pakistan | LN908794 |

|     |                           |      |          |          |
|-----|---------------------------|------|----------|----------|
| 207 | <i>Gossypium hirsutum</i> | 2016 | Pakistan | KX656816 |
| 208 | <i>Gossypium hirsutum</i> | 2016 | Pakistan | KX656817 |
| 209 | <i>Gossypium hirsutum</i> | 2016 | Pakistan | KX656818 |
| 210 | <i>Gossypium hirsutum</i> | 2016 | Pakistan | KX656819 |
| 211 | <i>Gossypium hirsutum</i> | 2016 | Pakistan | KX656820 |
| 212 | <i>Gossypium hirsutum</i> | 2016 | Pakistan | KX656821 |
| 213 | <i>Gossypium hirsutum</i> | 2016 | Pakistan | KX656822 |
| 214 | <i>Gossypium hirsutum</i> | 2016 | Pakistan | KX656823 |
| 215 | <i>Gossypium hirsutum</i> | 2016 | Pakistan | KX656824 |
| 216 | <i>Gossypium hirsutum</i> | 2016 | Pakistan | KX656825 |
| 217 | <i>Gossypium hirsutum</i> | 2016 | Pakistan | KX656826 |
| 218 | <i>Gossypium hirsutum</i> | 2016 | Pakistan | KX656827 |
| 219 | <i>Gossypium hirsutum</i> | 2016 | Pakistan | KX656828 |
